# Supplementary material for: SERS Immunosensors for Cancer Markers Detection
Source: MDPI journal article supplement (doi:10.3390/ma16103733), 2023-05-15
Supplement: s1 [file s1]

# SUPPLEMENTARY MATERIAL

## SERS Immunosensors for Cancer Markers Detection

Georgia Geka<sup>1</sup>, Anastasia Kanioura<sup>1</sup>, Vlassis Likodimos<sup>2</sup>, Spiros Gardelis<sup>2</sup>, Nikolaos Papanikolaou<sup>3</sup>, Sotirios Kakabakos<sup>1</sup> and Panagiota Petrou<sup>1,\*</sup>

<sup>1</sup> Immunoassays/Immunosensors Lab, Institute of Nuclear & Radiological Sciences & Technology, Energy & Safety, NCSR “Demokritos”, 15341 Aghia Paraskevi, Greece

<sup>2</sup> Section of Condensed Matter Physics, Department of Physics, National and Kapodistrian University of Athens, 15771 Zografou, Greece

<sup>3</sup> Institute of Nanoscience & Nanotechnology, NCSR “Demokritos”, 15341 Aghia Paraskevi, Greece

**Table S1.** SERS-based detection of PSA.

| Biomarker | Disease         | Sample                | Substrate/Label                                                                                           | LOD                    | Working range                            | Ref. |
|-----------|-----------------|-----------------------|-----------------------------------------------------------------------------------------------------------|------------------------|------------------------------------------|------|
| PSA       | prostate cancer | blood serum           | microtiter plate/Au nanoparticles modified with catalase + aggregated Au nanoparticles labeled with 4-MBA | 10 <sup>-9</sup> ng/nL | 10 <sup>-9</sup> -10 <sup>-7</sup> ng/mL | [61] |
|           |                 | buffer                | quartz slide/silica-coated Ag nanorods modified with 4-MBA                                                | 0.3 fg/mL              | 0.3 fg/mL-30 µg/mL                       | [62] |
|           |                 | synthetic human serum | magnetic beads /Au nanoparticles labeled with malachite green isothiocyanate                              | 0.1 ng/mL              | 0.1-200 ng/mL                            | [63] |
|           |                 | blood serum           | magnetic beads/Au nanoparticles modified with malachite green isothiocyanate                              | 0.01 ng/mL             | 0.01-100 ng/mL                           | [64] |
|           |                 | blood serum           | Ag nanoparticles on graphene oxide/streptavidin-glucose oxidase                                           | 0.23 pg/mL             | 0.5-5.00 pg/mL                           | [65] |
|           |                 | blood serum           | Au nanowires on silica wafer/ Ag aggregates modified with 2-naphthalenethiol                              | 1 fg/mL                | 1 fg/mL-1 µg/mL                          | [66] |

|          |             |                                                                                                                                                                                 |             |                       |      |
|----------|-------------|---------------------------------------------------------------------------------------------------------------------------------------------------------------------------------|-------------|-----------------------|------|
|          | blood serum | polyacrylamide gel containing a zinc finger peptide/magnetic Au nanoparticles/ ZnO-Au nanocomplexes                                                                             | 0.65 pg/mL  | 1 pg/mL-10 ng/mL      | [67] |
|          | blood serum | microparticles with Fe <sub>3</sub> O <sub>4</sub> core coated with TiO <sub>2</sub> and Au nanoparticles (Fe <sub>3</sub> O <sub>4</sub> @TiO <sub>2</sub> @Ag microparticles) | 16.25 pg/mL | 0.1 ng/mL-100 µg/mL   | [68] |
|          | blood serum | SiC sandpaper sputtered with Ag/ microparticles with Fe <sub>3</sub> O <sub>4</sub> core coated with TiO <sub>2</sub> and Au nanoparticles modified with 4-MBA                  | 1.871 pg/mL | 1.871 pg/mL-100 µg/mL | [69] |
|          | buffer      | electrospun polycaprolactone fibers decorated with Ag nanoparticles/Au nanoparticles modified with 4-MBA                                                                        | 1 pg/mL     | 1 pg/mL-1 µg/mL       | [70] |
|          | blood serum | magnetic nanoparticles/Au nanoparticles modified with 4,4'-dipyridyl                                                                                                            | 5.0 pg/mL   | 5.0-500 pg/mL         | [71] |
|          | blood serum | magnetic molecularly imprinted polymers prepared using tannic acid as monomer and diethylenetriamine as cross-linker/Au modified with 5,5' - dithiobis-(2-nitrobenzoic acid)    | 0.9 pg/mL   | 3.2 pg/mL-1 µg/mL     | [72] |
| free-PSA | blood serum | Au slide/nanoparticles with Au core modified with 1,4-benzenedithiol and covered by Au layer                                                                                    | 2.0 pg/mL   | 10 pg/mL-10 ng/mL     | [73] |

**Table S2.** SERS-based detection of AFP.

| Biomarker     | Disease      | Sample      | Substrate/Label                                                                                                                                                             | LOD                    | Working range                     | Ref. |
|---------------|--------------|-------------|-----------------------------------------------------------------------------------------------------------------------------------------------------------------------------|------------------------|-----------------------------------|------|
| AFP           | liver cancer | buffer      | Au array/hollow Au nanospheres                                                                                                                                              | 1 ng/mL                | 1-10 ng/mL                        | [75] |
|               |              | buffer      | glass slide with Au nanoparticles/Au nanoparticles modified with 4-MBA                                                                                                      | 100 pg/mL              | 1-100 ng/mL                       | [76] |
|               |              | buffer      | NiCo <sub>2</sub> O <sub>4</sub> nanorods decorated Ag nanoparticles/SiO <sub>2</sub> microspheres with Ag nanoparticles and 4-MBA                                          | 2.1 fg/mL              | 2.1 fg/mL-21 ng/mL                | [77] |
|               |              | blood serum | nitrocellulose membrane/Au nanospheres coated with an Ag layer, an ultrathin silica shell, and Au nanosphere satellites                                                     | 0.3 fg/mL              | 1 fg/mL-1 ng/mL                   | [78] |
|               |              | blood serum | nitrocellulose membrane/Au-Ag nanostars modified with 4-MBA and covered with a SiO <sub>2</sub> layer                                                                       | 0.72 pg/mL             | 3 pg/mL-3 µg/mL                   | [79] |
|               |              | blood serum | MoS <sub>2</sub> sheets/rhodamine 6G/Ag-coated Au nanocubes                                                                                                                 | 0.03 pg/mL             | 1 pg/mL-10 ng/mL.                 | [80] |
| AFP           |              | blood serum | molecular imprinted polymer on a glass slide/Ag nanoparticles modified with boronic acid                                                                                    | 1 ng/mL                | 1 ng/mL-10 µg/mL                  | [81] |
| AFP<br>AFP-L3 |              | blood serum | molecular imprinted polymers spotted onto Au nanoparticles-coated glass slide/Ag nanoparticles labelled with Raman reporters and covered with molecular imprinted molecules | 0.1 ng/mL<br>0.1 ng/mL | 0.1 ng/mL-10 µg/mL<br>0.1-8 ng/mL | [82] |
| AFP-L3        |              | buffer      | Ag/Fe/Ag films coated polystyrene colloidal particles monolayer modified with 5,5'-                                                                                         | 0.5 ng/mL              | 0.5-8 ng/mL                       | [83] |

|        |       |                                                                                                                                  |           |                |      |
|--------|-------|----------------------------------------------------------------------------------------------------------------------------------|-----------|----------------|------|
|        |       | dithiobis(succinimidyl-<br>2-nitrobenzoic acid                                                                                   |           |                |      |
| AFP    | blood | silicon substate with                                                                                                            | 0.5 ng/mL | 0.5-1000 ng/mL | [84] |
| AFP-L3 | serum | Ag nanoparticles<br>modified with 4-<br>MBA/Au nanoparticles<br>modified with 5,5-<br>dithiobis(succinimidyl-<br>2-nitrobenzoate | 8 ng/mL   | 8-1000 ng/mL   |      |

**Table S3.** SERS-based detection of CEA.

| Biomarker | Disease                | Sample       | Substrate/Label                                                                                                                                                                                                                                    | LOD         | Working range       | Ref. |
|-----------|------------------------|--------------|----------------------------------------------------------------------------------------------------------------------------------------------------------------------------------------------------------------------------------------------------|-------------|---------------------|------|
| CEA       | lung cancer            | buffer       | silica-coated magnetic microspheres/ hollow gold nanospheres modified with 4-MBA                                                                                                                                                                   | 10 pg/mL    | up to 100 ng/mL     | [86] |
|           | n.d.                   | buffer       | magnetic nickel-iron core particles with Au shell/Au nanoparticles modified with 4-MBA                                                                                                                                                             | 0.1 ng/mL   | 0.1-10 ng/mL        | [87] |
|           | colorectal cancer      | blood serum  | Fe <sub>2</sub> O <sub>3</sub> @Au nanoparticles/Au nanoparticles modified with 4-MBA                                                                                                                                                              | 0.1 ng/mL   | 1-50 ng/mL          | [88] |
|           | colorectal cancer      | whole blood  | magnetic nanoparticles/Au nanoparticles labeled with 4,4'-bipyridine                                                                                                                                                                               | 1 pg/mL     | 1 pg/mL-1 µg/mL     | [89] |
|           |                        |              | glass carbon electrodes with Au nanoparticles and chitosan/Au nanoparticles modified with polydopamine and decorated with Nile blue                                                                                                                | 1.38 ng/mL  | 2 -100 ng/mL        | [90] |
|           | different cancer types | blood plasma | Fe <sub>3</sub> O <sub>4</sub> @Au nanoparticles incorporated onto delaminated Ti <sub>3</sub> C <sub>2</sub> T <sub>x</sub> MXene sheets/ MoS <sub>2</sub> nanoflowers@Au nanoparticles modified with 4-MBA                                       | 0.033 pg/mL | 0.0001-100 ng/mL    | [91] |
|           | n.d.                   | blood serum  | polymer made of dopamine, m-aminophenylboronic acid monohydrate, and ammonium persulfate embedded Au nanoparticles modified with 4-mercaptopbenzonitrile & Ag aggregates/ Au nanoparticles modified with ethynylbenzene & covered by poly-dopamine | 0.064 pg/mL | 0.1 pg/mL- 10 µg/mL | [92] |
|           | colon cancer           | blood serum  | molecularly imprinted polymer of APTES, UPTES), IBTES, and                                                                                                                                                                                         | 100 pg/mL   | 1 ng/mL–10 µg/mL    | [93] |

|              |             |                                                                                                                                                                                                               |           |                   |      |
|--------------|-------------|---------------------------------------------------------------------------------------------------------------------------------------------------------------------------------------------------------------|-----------|-------------------|------|
|              |             | TEOS, over Au nanoparticles/<br>molecularly imprinted polymer of dopamine covered Ag nanoparticles                                                                                                            |           |                   |      |
| liver cancer | blood serum | boronate-affinity molecularly imprinted polymer prepared using 4-vinylbenzeneboronic acid as monomer and ethylene glycol dimethacrylate as cross-linked/Au nanoparticles labeled 4-mercaptophenylboronic acid | 0.1 ng/mL | 0.1 ng/mL-1 mg/mL | [94] |
| n.d.         | buffer      | molecularly-imprinted polymer of gallic acid on Au-screen-printed electrodes/Au nanostars coupled to 4-aminothiophenol                                                                                        | 1.0 ng/mL | 1.0 -1000 ng/mL   | [95] |

**Table S4.** SERS-based detection of cancer markers MUC4 and HE4.

| <b>Biomarker</b> | <b>Disease</b>       | <b>Sample</b>                     | <b>Substrate/Label</b>                                                                                        | <b>LOD</b>            | <b>Working range</b>                    | <b>Ref.</b> |
|------------------|----------------------|-----------------------------------|---------------------------------------------------------------------------------------------------------------|-----------------------|-----------------------------------------|-------------|
| MUC4/<br>Ca19-9  | pancreatic<br>cancer | cell<br>lysate/<br>blood<br>serum | silicon wafers with<br>Au layer/Au<br>nanoparticles<br>modified with 4-<br>nitrobenzenethiol                  | 33 ng/mL/<br>0.8 U/mL | 100 ng/mL-10 µg/mL/<br>0.8 U/mL-12 U/mL | [101]       |
| MUC4             |                      | blood<br>serum                    | atomically smooth<br>mica with Au<br>deposition/Au<br>nanoparticles<br>decorated with 4-<br>nitrobenzenethiol | n.d.                  | n.d.                                    | [102]       |
|                  |                      | buffer                            | silicon substrate<br>with Au<br>nanoflowers/Au<br>nanoflowers<br>modified with 4-<br>MBA                      | 0.1 ng/mL             | 0.1 ng/mL-10 µg/mL                      | [103]       |
| HE4              |                      | buffer                            | Fe <sub>3</sub> O <sub>4</sub> @Au<br>nanoparticles/Au<br>nanoparticles<br>modified with 4-<br>MBA            | 100 fg/mL             | 1 pg/mL-10 ng/mL                        | [107]       |
|                  |                      | buffer                            | single-crystalline<br>Au nanoplate/Au<br>nanoparticles<br>modified with<br>malachite green<br>isothiocyanate  | 0.31 fg/mL            | 0.31 fg/mL-31 ng/mL                     | [108]       |

\*n.d. = not defined

**Table S5.** SERS-based detection of different cancer markers.

| Biomarker                | Disease                      | Sample           | Substrate/Label                                                                                                                         | LOD                         | Working range                          | Ref.  |
|--------------------------|------------------------------|------------------|-----------------------------------------------------------------------------------------------------------------------------------------|-----------------------------|----------------------------------------|-------|
| VEGF                     | different cancer types       | blood serum      | Au triangle nanoarray/Au nanostars modified with malachite green isothiocyanate                                                         | 7 fg/mL                     | 0.1 pg/mL-10 ng/mL                     | [109] |
| HER2                     | breast cancer                | blood serum      | Au electrodes incorporated onto a microfluidic device/Au@Ag nanoshells modified with malachite green isothiocyanate or fluorescent tags | 10 fg/mL                    | 1 fg/mL-100 pg/mL                      | [110] |
| CA19-9                   | colorectal/pancreatic cancer | blood serum      | Fe <sub>3</sub> O <sub>4</sub> /TiO <sub>2</sub> /Au nanoparticles                                                                      | 5.65×10 <sup>-4</sup> IU/mL | 0.001-1000 IU/mL                       | [111] |
| p53<br>p53R175H          | different cancer types       | blood serum      | silicon modified with amine-silane & glutaraldehyde/Au nanoparticles with diazonium groups                                              | 10 <sup>-17</sup> M         | 10 <sup>-17</sup> -10 <sup>-10</sup> M | [112] |
| squamous cell carcinoma  | cervical cancer              | peripheral blood | polydopamine resin microspheres coated with Au nanoparticles/hollow Au nanocages modified with 4-MBA                                    | 8.03 pg/mL                  | 10 <sup>-5</sup> -10 <sup>-10</sup> M  | [113] |
| B7 homolog 6 protein     | cervical cancer              | blood serum      | Au coated silicon substrates modified with zwitterionic L-cysteine/Au nanoparticles functionalized with ATP                             | 10.8 fg/mL                  | n.d.                                   | [114] |
| Human carboxylesterase 1 | hepatocellular carcinoma     | blood serum      | raspberry-like Fe <sub>3</sub> O <sub>4</sub> /SiO <sub>2</sub> /Ag nanocomposites/Au nanoparticles modified with 4-MBA                 | 0.1 ng/mL                   | 0.1 ng/mL-1.0 mg/mL                    | [115] |



|                                            |                        |             |                                                                                                                                                       |                                  |                                                       |       |
|--------------------------------------------|------------------------|-------------|-------------------------------------------------------------------------------------------------------------------------------------------------------|----------------------------------|-------------------------------------------------------|-------|
| galectin-3-binding protein (LGALS3BP; 90K) | different cancer types | blood serum | Silicate glass slides coated with thin gold layer                                                                                                     | 15 ng/mL                         | n.d.                                                  | [116] |
| Ferritin                                   | liver cancer           | buffer      | sandpaper modified with Ag nanoparticles/mesoporous hybrid SiO <sub>2</sub> particles coated with Au nanoparticles and modified with 4-MBA            | 31.6 fg/mL                       | 1 pg/mL-10 µg/mL                                      | [117] |
| extracellular vesicles                     | different cancer types | buffer      | Fe <sub>3</sub> O <sub>4</sub> nanoparticles with a silica shell/nanorods with Au core and Ag shell modified with 5,5'-dithiobis(2-nitrobenzoic acid) | 1200 exosomes                    | n.d.                                                  | [118] |
| extracellular vesicles                     | different cancer types | plasma      | magnetic beads/Au nanoparticles modified with different Raman tags                                                                                    | 2.3×10 <sup>6</sup> particles/mL | 2.3×10 <sup>6</sup> -2.3×10 <sup>8</sup> particles/mL | [119] |
| α-thrombin tumor necrosis factor-α         | different cancer types | blood serum | Au film with methylene blue/Au nanoparticles labeled with 4-nitrobenzenethiol                                                                         | 86 pM<br>0.07 nM                 | 86 pM-1 nM<br>0.07 nM-1.2 nM                          | [120] |
| BRCA1 protein                              | breast cancer          | blood serum | Ag grains                                                                                                                                             | 0.1 ng/mL                        | n.d.                                                  | [121] |

\*n.d.=not determined

**Table S6.** SERS-based detection of interleukins as cancer markers.

| Biomarker | Disease                 | Sample      | Substrate/Label                                                                                                                                                            | LOD        | Working range      | Ref.  |
|-----------|-------------------------|-------------|----------------------------------------------------------------------------------------------------------------------------------------------------------------------------|------------|--------------------|-------|
| IL-6      | different cancer types  | buffer      | glass slide/Au-Ag nanoshells stabilized with a self-assembled monolayer of 5,5'-dithiobis(2-nitrobenzoic acid) molecules comprising terminal mono- and tri-ethylene glycol | 1 pg/mL    | 1 pg/mL-1 µg/mL    | [123] |
| IL-8      | gastric & breast cancer | human serum | Au nanoparticles/Au nanocages modified with 4-MBA                                                                                                                          | 6.04 pg/mL | 10 pg/mL-1 µg/mL   | [124] |
| IL-6      | different cancer types  | blood       | Ag-Au substate incorporated into microfluidic device/Au nanoparticles modified with 5,5'-dithio-bis(2-nitro-benzoic acid), fuchsin or 4-MBA                                | 3.8 pg/mL  | 3.8 pg/mL-30 ng/mL | [125] |
| IL-8      |                         | plasma      |                                                                                                                                                                            | 7.5 pg/mL  | 7.5 pg/mL-30 ng/mL |       |
| IL-18     |                         |             |                                                                                                                                                                            | 5.2 pg/mL  | 5.2 pg/mL-30 ng/mL |       |

**Table S7.** Multiplexed SERS-based detection of cancer markers.

| Biomarker                         | Disease                      | Sample | Substrate/Label                                                                                                                                                                      | LOD                                                       | Working range                                                 | Ref.  |
|-----------------------------------|------------------------------|--------|--------------------------------------------------------------------------------------------------------------------------------------------------------------------------------------|-----------------------------------------------------------|---------------------------------------------------------------|-------|
| AFP<br>angiotensin                | different<br>cancer<br>types | buffer | micropatterned<br>Au film/hollow<br>Au nanospheres                                                                                                                                   | 0.1 pg/mL<br>1.0 pg/mL                                    | 0.1 pg/mL-0.1 µg/mL<br>1.0 pg/mL-0.1 µg/mL                    | [125] |
| CEA<br>AFP                        | lung<br>cancer               | serum  | magnetic<br>beads/hollow Au<br>nanospheres with<br>Raman tags                                                                                                                        | n.d.<br>n.d.                                              | up to 100 ng/mL                                               | [126] |
| MMP-7<br>CA19-9                   | pancreatic<br>cancer         | serum  | Au coated<br>slide/Au<br>nanoparticles<br>modified with<br>5,5'-<br>dithiobis(succini<br>midyl-2-<br>nitrobenzoate)                                                                  | 2.28 pg/mL<br>34.5 pg/mL                                  | 2.28 pg/mL-6 ng/mL<br>34.5 pg/mL-18 ng/mL                     | [127] |
| CA125<br>HER2<br>HE4<br>eotaxin-1 | breast<br>cancer             | serum  | Au nanostars/Au<br>nanostars<br>modified with<br>Rhodamine 6G                                                                                                                        | 15 fM<br>17 fM<br>21 fM<br>6.5 fM                         | 15 fM-10 pM<br>17 fM-10 pM<br>21 fM-10 pM<br>6.5 fM-10pM      | [128] |
| CA15-3<br>CA27-29<br>CEA          | breast<br>cancer             | serum  | quartz slide<br>using/Au<br>nanostars<br>modified with 4-<br>nitrothiophenol<br>embedded in SiO <sub>2</sub>                                                                         | 0.99 U/mL<br>0.13 U/mL<br>0.05 ng/mL                      | 0.1 U/mL-500 U/mL<br>0.1 U/mL-500 U/mL<br>0.1 ng/mL-500 ng/mL | [129] |
| CEA<br>AFP                        | different<br>cancer<br>types | serum  | Ag<br>nanoparticles/peri<br>odically arranged<br>monodisperse<br>nanoparticles of<br>SiO <sub>2</sub> decorated<br>with Ag particles                                                 | 6.6 x10 <sup>-6</sup> ng/mL<br>7.2x10 <sup>-5</sup> ng/mL | 0.01 pg/mL-1000 ng/mL<br>0.1 pg/mL-1000 ng/mL                 | [130] |
| CEA<br>cytokeratin<br>-19         | lung<br>cancer               | serum  | electrodes<br>modified with<br>chitosan<br>stabilized Au<br>nanoparticles/ami<br>nosalicyclic acid-<br>based resin<br>microspheres<br>modified Raman<br>tags and Au<br>nanoparticles | 0.01 ng/mL<br>0.04 ng/mL                                  | 0.05-80 ng/mL                                                 | [131] |
| CEA<br>AFP<br>CA125               |                              | serum  | superparamagneti<br>c Fe <sub>3</sub> O <sub>4</sub> @SiO <sub>2</sub><br>particles/hybrid<br>multilayered<br>nanoshells                                                             | 0.1 pg/mL<br>n.d.<br>n.d                                  | 0.1 pg/mL-1 ng/mL<br>n.d.<br>n.d.                             | [132] |

|                                                                                                            |                        |       |                                                                                                                |                                                       |                                                                                                              |       |
|------------------------------------------------------------------------------------------------------------|------------------------|-------|----------------------------------------------------------------------------------------------------------------|-------------------------------------------------------|--------------------------------------------------------------------------------------------------------------|-------|
| prepared by assembly of small Ag nanoparticles at the surface of silica particles modified with Raman tags |                        |       |                                                                                                                |                                                       |                                                                                                              |       |
| CEA<br>neuron-specific enolase                                                                             | lung cancer            | serum | magnetic nanoparticles/flower-like gold nanoparticles with Raman tags                                          | 1.48 pg/mL<br>2.04 pg/mL                              | 1 fg/mL-1 ng/mL                                                                                              | [133] |
| PSA<br>AFP<br>CA19-9                                                                                       | different cancer types | serum | SiC sandpaper with sputtered Ag film/Si nanoparticles coated with SiO <sub>2</sub>                             | 1.79 fg/mL<br>0.46 fg/mL<br>1.3×10 <sup>-3</sup> U/mL | 1.79 fg/mL-71.87 ng/mL<br>0.46 fg/mL-95.75 ng/ml<br>1.3×10 <sup>-3</sup> -10 <sup>3</sup> U mL <sup>-1</sup> | [134] |
| PSA<br>prostate-specific membrane antigen<br>human kallikrein 2                                            | prostate cancer        | serum | SiC sandpaper with a sputtered Ag film/Ag nanoparticles with 4-MBA                                             | 0.46 fg/mL<br>1.05 fg/mL<br>0.67 fg/mL                | 0.46 fg/mL-1 ng/mL<br>1.05 fg/mL-1 ng/mL<br>0.67 fg/mL-1 ng/mL                                               | [135] |
| CEA<br>AFP                                                                                                 | different cancer types | serum | Au nanohoneycomb arrays/Au nanostars modified with 4-MBA or DTNB                                               | 0.44 ng/ml<br>0.40 ng/ml                              | 0.5-100 ng/mL<br>0.5-100 ng/mL                                                                               | [136] |
| CA153<br>CA125<br>CEA                                                                                      | different cancer types | serum | polydimethylsiloxane which Ag nanoparticles/Ag aggregates labelled with Raman tags                             | 0.01 U/mL<br>0.01 U/mL<br>1pg /mL                     | 0.01-1000 U/mL<br>0.01-1000 U/mL<br>1 pg/mL-100 ng/mL                                                        | [137] |
| PSA<br>AFP                                                                                                 | different cancer types | serum | Au-film hemisphere array/silica beads coated with Ag nanoparticles and modified with 4MBA or 4-nitrothiophenol | 3.38 fg/mL<br>4.87 fg/mL                              | 10 fg/mL-400 ng/mL<br>10 fg/mL-400 ng/mL                                                                     | [138] |
| AFP<br>CEA<br>FER                                                                                          | liver cancer           | serum | magnetic beads/Au nanoparticles modified with Raman tags                                                       | 0.15 pg/mL<br>20 pg/mL<br>4 pg/mL                     | 0.5-500 pg/mL<br>50-2000 pg/mL<br>10-200 pg/mL                                                               | [139] |
| TNF-α                                                                                                      | different cancer       | cell  | magnetic particles/Au                                                                                          | 4.5 pg/mL<br>n.d.                                     | 4.5 pg/mL-10 ng/mL<br>n.d.                                                                                   | [140] |

|                                               |                              |                           |                                                                                                                                                                                   |                                                      |                                                                        |       |
|-----------------------------------------------|------------------------------|---------------------------|-----------------------------------------------------------------------------------------------------------------------------------------------------------------------------------|------------------------------------------------------|------------------------------------------------------------------------|-------|
| interferon-<br>$\gamma$<br>interleukin-<br>10 | types                        | culture<br>medium         | nanoparticles<br>modified with<br>Rama tags and<br>covered with an<br>Ag layer                                                                                                    | n.d.                                                 | n.d.                                                                   |       |
| VEGF<br>interleukin-<br>8                     | different<br>cancer<br>types | cell<br>culture<br>medium | Ag<br>nanoparticles/ma<br>gnetic beads<br>modified with<br>Raman tags                                                                                                             | 1.0 fg/mL<br>1.0 fg/mL                               | 1.0 fg/mL-10 pg/mL                                                     | [141] |
| SCCA<br>osteopontin                           | cervical<br>cancer           | serum                     | hydrophobic filter<br>paper decorated<br>with Au<br>nanoflowers/Au-<br>Ag nanoshuttles                                                                                            | 8.628 pg/mL<br>4.388 pg/mL                           | 10 pg/mL-10 $\mu$ g/mL                                                 | [142] |
| SCCA<br>CA125                                 | cervical<br>cancer           | serum                     | nitrocellulose<br>membrane/<br>polydopamine<br>nanospheres<br>decorated with<br>Ag nano-particles<br>and Raman tags                                                               | 8.093 pg/mL<br>7.370 pg/mL                           | 10 pg/mL to 10 $\mu$ g/mL.                                             | [143] |
| SCCA<br>Surviving                             | cervical<br>cancer           | serum                     | arrays of Au–Ag<br>nanoboxes/Au–<br>Ag nanoshells<br>modified with<br>Raman tags                                                                                                  | 6 pg/mL<br>5 pg/mL                                   | 10 pg/mL-10 $\mu$ g/mL<br>10 pg/mL-10 $\mu$ g/mL                       | [144] |
| SCCA<br>CEA                                   | cervical<br>cancer           | serum                     | microfluidic chip<br>consisting of six<br>detection areas of<br>SiO <sub>2</sub> particles<br>decorated with<br>Au<br>nanoparticles/Ag<br>nanocubes<br>labeled with<br>Raman tags | 0.45 pg/mL<br>0.36 pg/mL                             | 1 pg/mL-1 $\mu$ g/mL<br>1 pg/mL-1 $\mu$ g/mL                           | [145] |
| PSA<br>CEA<br>CA19-9                          | different<br>cancer<br>types | buffer                    | 2D arrays of Au<br>core-Ag shell<br>nanoparticles/4-<br>MBA-labeled Au<br>nanoparticles                                                                                           | 1 pg/mL<br>1 pg/mL<br>10 U/mL                        | 1 pg/mL-1 ng/mL<br>1 pg/mL-1 ng/mL<br>10-40 U/mL                       | [146] |
| PSA<br>AFP<br>CEA<br>NSE                      | different<br>cancer<br>types | buffer                    | photopatterned<br>substrate/Au<br>nanoparticles<br>labeled with 4-<br>MBA                                                                                                         | 0.19 ng/mL<br>0.60 ng/mL<br>0.13 ng/mL<br>0.26 ng/mL | 0.5-50.0 ng/mL<br>1.0–100.0 ng/mL<br>0.5–50.0 ng/mL<br>1.0–100.0 ng/mL | [147] |
| CEA<br>AFP                                    | different<br>cancer<br>types | serum                     | gold<br>microelectrode<br>array with<br>electrodeposited                                                                                                                          | 0.6 pg/mL<br>0.3 pg/mL                               | 5-200 pg/mL<br>2-100 pg/mL                                             | [148] |
